# Supplementary material for: A general synthesis approach in action: preparation and characterization of polyoxomolybdenum(vi) organophosphonates through oxidative Mo–Mo bond cleavage in {MoV2O4}
Source: Royal Society of Chemistry journal article supplement (doi:10.1039/c2ce25093d), 2012-01-01
Supplement: c2ce25093d.pdf [file c2ce25093d.pdf]

Electronic Supplementary Information  
**A general synthesis approach in action: Preparation and characterization of polyoxomolybdenum(VI) organophosphonates through oxidative Mo-Mo bond cleavage in  $\{\text{Mo}^{\text{V}}_2\text{O}_4\}$**

Lijuan Zhang, Jingmei Sun, Yunshan Zhou, Sadaf ul Hassan, Enbo Wang and Zonghai Shi

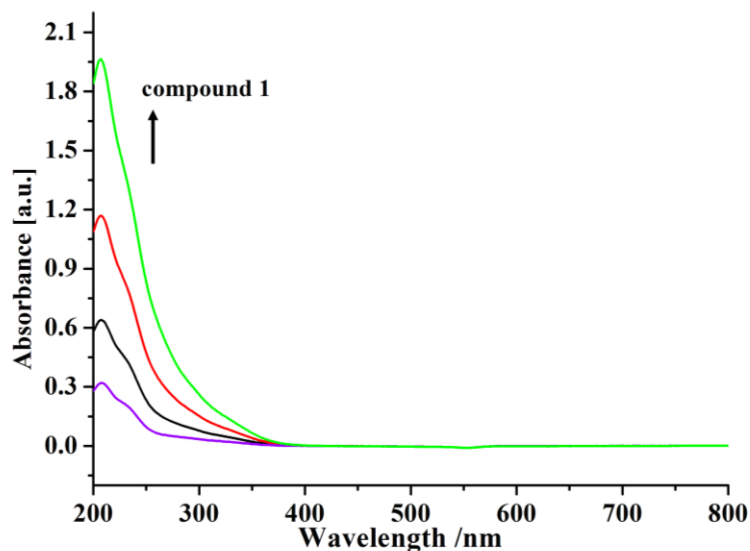

Figure S1 The UV-Vis spectra for compounds **1** in aqueous solution at different arbitrary concentration. The arrow marks the increase of concentration.

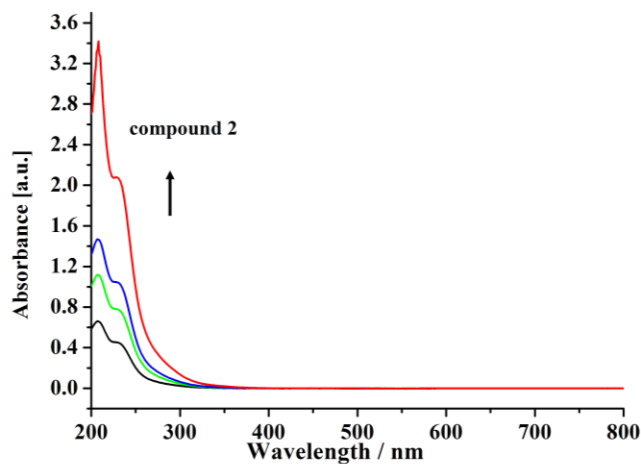

Figure S2 The UV-Vis spectra for compounds **2** in aqueous solution at different arbitrary concentration. The arrow marks the increase of concentration.

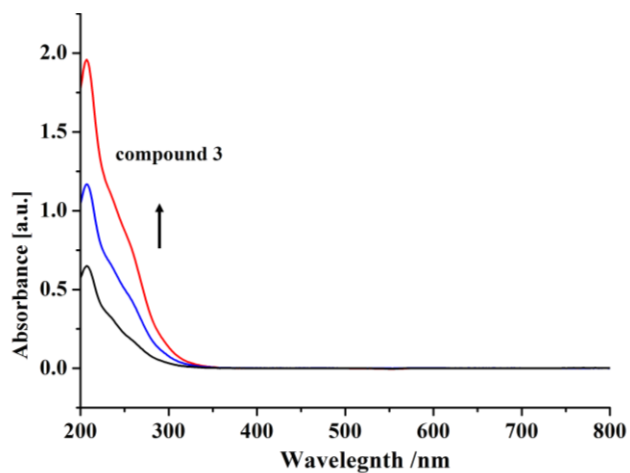

Figure S3 The UV-Vis spectra for compounds **3** in aqueous solution at different arbitrary concentration. The arrow marks the increase of concentration.

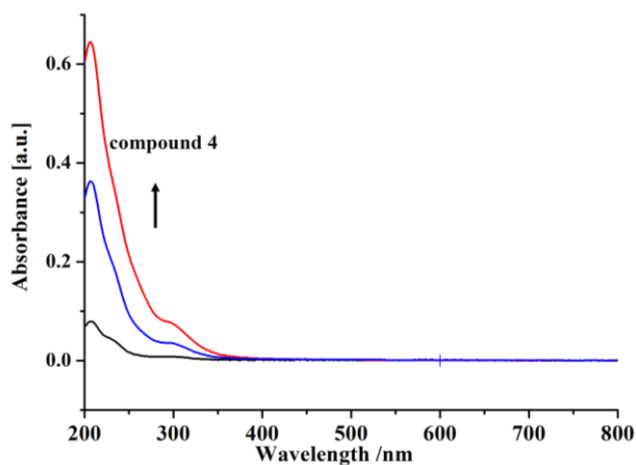

Figure S4 The UV-Vis spectra for compounds **4** in aqueous solution at different arbitrary concentration. The arrow marks the increase of concentration.

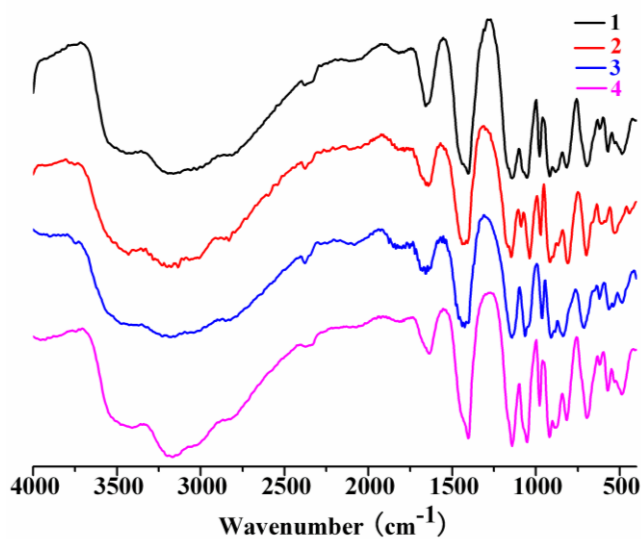

Figure S5. IR spectra of the compounds **1~ 4**

**Table S1.** Assignments of IR spectroscopy data (unit:  $\text{cm}^{-1}$ ) of the compounds **1** - **4**

| <b>1</b> | <b>2</b> | <b>3</b> | <b>4</b> | Assignment <sup>[1,2,3]</sup>                   |
|----------|----------|----------|----------|-------------------------------------------------|
| 3196 (s) | 3430 (m) | 3178 (s) | 3172 (s) | NH <sub>4</sub> <sup>+</sup> , H <sub>2</sub> O |
|          | 3136 (s) |          |          |                                                 |
| 1677 (m) | 1641 (m) | 1659 (m) | 1659 (m) |                                                 |
| 1428 (s) | 1440 (s) | 1425 (s) | 1404 (s) | HEDP                                            |
| 1146 (s) | 1146 (s) | 1143 (s) | 1143 (s) |                                                 |
| 1088 (w) | 1088 (w) | -        | 1053 (s) |                                                 |
| 1038 (s) | 1038 (s) | 1065 (s) | 978 (m)  |                                                 |
| 970 (m)  | 955 (m)  | 969 (m)  | 918 (s)  | Mo=O                                            |
| 915 (s)  | 915 (s)  | 908 (s)  | 879 (m)  | Mo-O                                            |
| 801 (s)  | 810 (s)  | 840 (s)  | 815 (m)  |                                                 |
| 699 (m)  | 699 (m)  | 764 (m)  | 696 (m)  |                                                 |
| 531 (w)  | 531 (w)  | 564 (w)  | 573 (w)  |                                                 |

[1] H. Tan, W. Chen, D. Liu, E. Wang, *Dalton Trans.* 2010, **39**, 1245.

[2] X. Zhang, J. Xu, J. Yu, J. Lu, Y. Xu, Y. Chen, T. Wang, X. Yu, Q. Yang, Q. Hou, *J. Solid State Chem.*, 2007, **180**, 1949.

[3] C. Wei, J. Chen, Y. Huang, T. Lan, Z. Li, W. Zhang, Z. Zhang, *J. Mol. Struct.*, 2006, **798**, 117.

**Table S2.** BVS parameters for the Mo and Fe atoms in **1**.

| Bond   | Bond length | Bond Valence | Valence Sum                  |
|--------|-------------|--------------|------------------------------|
| Mo1-O1 | 1.700       | 1.831        | $\Sigma(\text{Mo1}) = 6.135$ |
| Mo1-O1 | 1.700       | 1.831        |                              |
| Mo1-O2 | 1.796       | 1.349        |                              |
| Mo1-O3 | 2.015       | 0.672        |                              |
| Mo1-O4 | 2.357       | 0.226        |                              |
| Mo1-O4 | 2.357       | 0.226        |                              |
| Bond   | Bond length | Bond Valence | Valence Sum                  |
| Mo2-O3 | 1.848       | 1.143        | $\Sigma(\text{Mo5}) = 5.532$ |
| Mo2-O4 | 2.386       | 0.206        |                              |
| Mo2-O4 | 2.386       | 0.206        |                              |
| Mo2-O7 | 1.955       | 0.813        |                              |
| Mo2-O8 | 1.746       | 1.582        |                              |
| Mo2-O8 | 1.746       | 1.582        |                              |
| Bond   | Bond length | Bond Valence | Valence Sum                  |
| Fe1-O2 | 1.951       | 0.595        | $\Sigma(\text{Fe1}) = 3.161$ |
| Fe1-O2 | 1.951       | 0.595        |                              |
| Fe1-O6 | 2.021       | 0.493        |                              |

**Table S3.** BVS parameters for the Mo and Cr atoms in **2**.

| Bond   | Bond length | Bond Valence | Valence Sum                  |
|--------|-------------|--------------|------------------------------|
| Mo1-O2 | 2.327       | 0.249        | $\Sigma(\text{Mo1}) = 5.931$ |
| Mo1-O2 | 2.327       | 0.249        |                              |
| Mo1-O5 | 1.792       | 1.366        |                              |
| Mo1-O6 | 2.014       | 0.674        |                              |
| Mo1-O7 | 1.724       | 1.697        |                              |
| Mo1-O7 | 1.724       | 1.697        |                              |
| Bond   | Bond length | Bond Valence | Valence Sum                  |
| Mo2-O2 | 2.370       | 0.217        | $\Sigma(\text{Mo2}) = 5.730$ |
| Mo2-O2 | 2.370       | 0.217        |                              |
| Mo2-O4 | 1.958       | 0.805        |                              |
| Mo2-O6 | 1.867       | 1.076        |                              |
| Mo2-O8 | 1.722       | 1.708        |                              |
| Mo2-O8 | 1.722       | 1.708        |                              |
| Bond   | Bond length | Bond Valence | Valence Sum                  |
| Cr1-O1 | 1.975       | 0.507        | $\Sigma(\text{Cr1}) = 3.173$ |
| Cr1-O1 | 1.975       | 0.507        |                              |
| Cr1-O1 | 1.975       | 0.507        |                              |
| Cr1-O1 | 1.975       | 0.507        |                              |
| Cr1-O5 | 1.931       | 0.572        |                              |

**Table S4.** BVS parameters for the Mo atoms in **4**.

| Bond    | Bond length | Bond Valence | Valence Sum                  |
|---------|-------------|--------------|------------------------------|
| Mo1-O2  | 2.332       | 0.245        | $\Sigma(\text{Mo1}) = 5.866$ |
| Mo1-O5  | 2.338       | 0.240        |                              |
| Mo1-O7  | 1.980       | 0.751        |                              |
| Mo1-O8  | 1.857       | 1.111        |                              |
| Mo1-O9  | 1.696       | 1.855        |                              |
| Mo1-O10 | 1.730       | 1.665        |                              |
| Bond    | Bond length | Bond Valence | Valence Sum                  |
| Mo2-O2  | 2.332       | 0.245        | $\Sigma(\text{Mo2}) = 5.926$ |
| Mo2-O5  | 2.308       | 0.264        |                              |
| Mo2-O8  | 2.010       | 0.682        |                              |
| Mo2-O11 | 1.774       | 1.447        |                              |
| Mo2-O12 | 1.740       | 1.612        |                              |
| Mo2-O13 | 1.728       | 1.675        |                              |
| Bond    | Bond length | Bond Valence | Valence Sum                  |
| Mo3-O1  | 2.131       | 0.464        | $\Sigma(\text{Mo3}) = 4.976$ |
| Mo3-O4  | 2.129       | 0.467        |                              |
| Mo3-O11 | 2.161       | 0.422        |                              |
| Mo3-O14 | 1.680       | 1.952        |                              |
| Mo3-O15 | 1.947       | 0.834        |                              |
| Mo3-O16 | 1.940       | 0.837        |                              |
| Bond    | Bond length | Bond Valence | Valence Sum                  |
| Mo4-O15 | 1.952       | 0.821        | $\Sigma(\text{Mo4}) = 4.973$ |
| Mo4-O16 | 1.950       | 0.826        |                              |
| Mo4-O17 | 1.682       | 1.939        |                              |
| Mo4-O18 | 2.121       | 0.479        |                              |
| Mo4-O21 | 2.140       | 0.451        |                              |
| Mo4-O26 | 2.136       | 0.457        |                              |
| Bond    | Bond length | Bond Valence | Valence Sum                  |
| Mo5-O19 | 2.305       | 0.267        | $\Sigma(\text{Mo5}) = 5.928$ |
| Mo5-O22 | 2.316       | 0.258        |                              |
| Mo5-O25 | 2.034       | 0.632        |                              |
| Mo5-O26 | 1.787       | 1.388        |                              |
| Mo5-O27 | 1.730       | 1.665        |                              |
| Mo5-O28 | 1.720       | 1.718        |                              |
| Bond    | Bond length | Bond Valence | Valence Sum                  |
| Mo6-O2  | 2.354       | 0.228        | $\Sigma(\text{Mo6}) = 5.899$ |
| Mo6-O5  | 2.346       | 0.234        |                              |
| Mo6-O7  | 1.963       | 0.793        |                              |
| Mo6-O8  | 1.872       | 1.059        |                              |
| Mo6-O9  | 1.720       | 1.718        |                              |
| Mo6-O10 | 1.694       | 1.867        |                              |
